# Supplementary material for: Multi-targeting therapeutic mechanisms of the Chinese herbal medicine QHD in the treatment of non-alcoholic fatty liver disease
Source: PubMed Central journal article supplement (PMC5438611; doi:10.18632/oncotarget.15482), 2017-02-18
Supplement: oncotarget-08-27820-s001.pdf [file oncotarget-08-27820-s001.pdf]

## Multi-targeting therapeutic mechanisms of the Chinese herbal medicine QHD in the treatment of non-alcoholic fatty liver disease

### Supplementary Materials

**Supplementary Table 1: Pathways enriched with DEGs with elevated expression in NAFLD model compared to control ( $P$  value < 0.05).** see Supplementary\_Table\_1

**Supplementary Table 2: Pathways enriched with DEGs with decreased expression in NAFLD model compared to control ( $P$  value < 0.05)<sup>a</sup>**

| Ingenuity Canonical Pathways <sup>b</sup>                            | $P$ value <sup>c</sup> | Molecules <sup>d</sup>       |
|----------------------------------------------------------------------|------------------------|------------------------------|
| Adipogenesis pathway                                                 | 0.0069                 | HDAC4,FZD3,SMO,FBXW7,RPS6KC1 |
| Factors Promoting Cardiogenesis in Vertebrates                       | 0.0110                 | FZD3,SMO,NPPA,TCF7L2         |
| Oxidative Ethanol Degradation III                                    | 0.0120                 | ACSS2,ALDH3A1                |
| Ethanol Degradation IV                                               | 0.0178                 | ACSS2,ALDH3A1                |
| Tetrahydropterin Biosynthesis I                                      | 0.0275                 | PTS                          |
| 1D-myo-inositol Hexakisphosphate Biosynthesis V (from Ins(1,3,4)P3)  | 0.0275                 | ITPK1                        |
| Tetrahydropterin Biosynthesis II                                     | 0.0275                 | PTS                          |
| Basal Cell Carcinoma Signaling                                       | 0.0302                 | FZD3,SMO,TCF7L2              |
| Ovarian Cancer Signaling                                             | 0.0347                 | BRAF,FZD3,SMO,TCF7L2         |
| Role of Wnt/GSK-3 $\beta$ Signaling in the Pathogenesis of Influenza | 0.0355                 | FZD3,SMO,TCF7L2              |
| Acetate Conversion to Acetyl-CoA                                     | 0.0372                 | ACSS2                        |
| Ethanol Degradation II                                               | 0.0427                 | ACSS2,ALDH3A1                |
| HIPPO signaling                                                      | 0.0468                 | TJP2,AJUBA,PARD3             |
| Epithelial Adherens Junction Signaling                               | 0.0490                 | MYH2,Actn3,PARD3,TCF7L2      |

<sup>a</sup>Pathway analysis was performed with Ingenuity Pathways Analysis (IPA; Ingenuity Systems, Inc., Redwood City, CA, www.ingenuity.com) tool. Canonical pathways with significant  $p$  values ( $p$  value < 0.05) are listed.

<sup>b</sup>Enriched canonical pathways associated with the input gene list.

<sup>c</sup> $P$  values calculated by Fisher's exact test right-tailed for gene enrichment analysis, It ranges from 0 to 1.

Fisher's exact  $P$  Value = 0 represents perfect enrichment.  $P$  values smaller than 0.05 are considered strongly enriched in the canonical pathways.

<sup>d</sup>Molecules in the pathway overlapping with the input gene list.

**Supplementary Table 3: Pathways enriched with DEGs with elevated expression in QHD compared to NAFLD model ( $P$  value < 0.05).** see Supplementary\_Table\_3

**Supplementary Table 4: Pathways enriched with DEGs with decreased expression in QHD compared to NAFLD model ( $P$  value < 0.05).** see Supplementary\_Table\_4

**Supplementary Table 5: Pathways enriched with DEGs with elevated expression in GC compared to NAFLD model ( $P$  value < 0.05).** see Supplementary\_Table\_5

**Supplementary Table 6: Pathways enriched with DEGs with decreased expression in GC compared to NAFLD model ( $P$  value < 0.05).** see Supplementary\_Table\_6

**Supplementary Table 7: Primers for qRT-PCR.** see Supplementary\_Table\_7
